# Supplementary material for: Benchmarking quantum annealing with maximum cardinality matching problems
Source: Frontiers journal article supplement (doi:10.3389/fcomp.2024.1286057), 2024-06-05
Supplement: Data_Sheet_1.PDF [file Data_Sheet_1.PDF]

# Supplementary Material

## 1 SUPPLEMENTARY TABLES

Tables S1 and S2 show the relative chain strength and annealing time values used to obtain the results presented in Table II of the main text. Table S3 shows the relative chain strength values used to obtain the results presented in Tables III and IV of the main text. Tables S4 and S5 show statistics on the embeddings used to pick the random ones from, and statistics on all generated embeddings, respectively. The embeddings were generated with `dwave-ocean-sdk` version 6.2.0 installed including the package `minorminer` version 0.2.10.

**Table S1.** Relative chain strength (RCS) and annealing time (AT) used during data acquisition for DW\_2000Q\_6 and Advantage2\_prototype1.1.

|       |               | DW_2000_Q | Advantage2<br>prototype 1.1 |
|-------|---------------|-----------|-----------------------------|
| $G_1$ | RCS           | 0.40      | -                           |
|       | AT [ $\mu$ s] | 20.00     | 2.88                        |
| $G_2$ | RCS           | 0.45      | 0.48                        |
|       | AT [ $\mu$ s] | 41.38     | 52.73                       |
| $G_3$ | RCS           | 0.67      | 0.67                        |
|       | AT [ $\mu$ s] | 1777.89   | 225.77                      |
| $G_4$ | RCS           | 0.81      | 0.86                        |
|       | AT [ $\mu$ s] | 626.95    | 225.77                      |

**Table S2.** Relative Chain Strength (RCS) and Annealing Time (AT) values used during data acquisition from Advantage\_System 4.1, 5.2 and 6.1.

|       |               | Advantage<br>System 4.1 | Advantage<br>System 5.2 | Advantage<br>System 6.1 |
|-------|---------------|-------------------------|-------------------------|-------------------------|
| $G_1$ | AT [ $\mu$ s] | 100                     | 100                     | 100                     |
| $G_2$ | RCS           | 0.40                    | 0.40                    | 0.44                    |
|       | AT [ $\mu$ s] | 202.47                  | 144.44                  | 188.89                  |
| $G_3$ | RCS           | 0.50                    | 0.60                    | 0.56                    |
|       | AT [ $\mu$ s] | 1616.26                 | 166.67                  | 288.89                  |
| $G_4$ | RCS           | 0.67                    | 0.58                    | 0.71                    |
|       | AT [ $\mu$ s] | 626.61                  | 322.22                  | 200.0                   |
| $G_5$ | RCS           | 0.57                    | 0.76                    | 0.64                    |
|       | AT [ $\mu$ s] | 1919.21                 | 322.22                  | 166.67                  |
| $G_6$ | RCS           | 0.89                    | 0.80                    | 0.82                    |
|       | AT [ $\mu$ s] | 1656.65                 | 122.22                  | 533.33                  |
| $G_7$ | RCS           | 1.16                    | 0.82                    | 0.87                    |
|       | AT [ $\mu$ s] | 1899.02                 | 1466.67                 | 677.78                  |

**Table S3.** Relative chain strength (RCS) used during data acquisition for Advantage\_system4.1 and Advantage2\_prototype1.1 for random and improved embeddings.

|                     | Advantage_system4.1 | Advantage2<br>prototype 1.1 |
|---------------------|---------------------|-----------------------------|
| $G_2^{\text{rand}}$ | 0.550               | 0.450                       |
| $G_2^{\text{imp}}$  | 0.425               | 0.450                       |
| $G_3^{\text{rand}}$ | 0.440               | 0.425                       |
| $G_3^{\text{imp}}$  | 0.465               | 0.435                       |
| $G_4^{\text{rand}}$ | 0.360               | 0.450                       |
| $G_4^{\text{imp}}$  | 0.325               | 0.400                       |
| $G_5^{\text{rand}}$ | 0.340               | n.a.                        |
| $G_5^{\text{imp}}$  | 0.300               | n.a.                        |
| $G_6^{\text{rand}}$ | 0.320               | n.a.                        |
| $G_6^{\text{imp}}$  | 0.300               | n.a.                        |
| $G_7^{\text{rand}}$ | 0.300               | n.a.                        |
| $G_7^{\text{imp}}$  | 0.300               | n.a.                        |

**Table S4.** Statistics on the 30 generated embeddings from which the random embeddings are picked. Shown are the average qubit number with standard deviation, the minimal and maximal qubit numbers, the qubit number of the used random embedding and the seed which was used to generate the random embedding.

|                         | average              | min. | max. | used | seed |
|-------------------------|----------------------|------|------|------|------|
| Advantage2_prototype1.1 |                      |      |      |      |      |
| $G_2$                   | $38.33 \pm 1.47$     | 37   | 42   | 37   | 26   |
| $G_3$                   | $129.10 \pm 6.77$    | 118  | 145  | 126  | 28   |
| $G_4$                   | $346.60 \pm 17.29$   | 324  | 393  | 333  | 25   |
| Advantage_system4.1     |                      |      |      |      |      |
| $G_2$                   | $41.57 \pm 1.54$     | 39   | 45   | 44   | 14   |
| $G_3$                   | $144.60 \pm 5.21$    | 134  | 154  | 142  | 19   |
| $G_4$                   | $404.60 \pm 19.24$   | 372  | 438  | 438  | 10   |
| $G_5$                   | $974.33 \pm 70.65$   | 899  | 1254 | 935  | 26   |
| $G_6$                   | $1985.50 \pm 117.84$ | 1825 | 2287 | 1971 | 7    |
| $G_7$                   | $3632.30 \pm 146.54$ | 3358 | 4029 | 3635 | 8    |

## 2 SUPPLEMENTARY FIGURES

Figures S1 to S3 show possible minor embeddings of the  $G_1$  graph which match the labeling of the qubits used for the (ideal) quantum annealing simulations to produce Fig. 5 of the main text. Figure S4 shows a possible embedding onto the Pegasus graph which does not require minor embedding (i.e., each logical variable is mapped onto a single physical qubit).

**Table S5.** Statistics on all generated embeddings. Shown are the average qubit number with standard deviation, the minimal and maximal qubit numbers, the seed which generated the embedding with the minimal qubit number and the total number of generated embeddings per instance.

|                         | average              | min. | max. | seed of min. | total |
|-------------------------|----------------------|------|------|--------------|-------|
| Advantage2_prototype1.1 |                      |      |      |              |       |
| $G_2$                   | $38.03 \pm 1.61$     | 33   | 45   | 402          | 500   |
| $G_3$                   | $127.44 \pm 7.56$    | 112  | 157  | 75           | 500   |
| $G_4$                   | $346.41 \pm 18.54$   | 307  | 417  | 380          | 400   |
| Advantage_system4.1     |                      |      |      |              |       |
| $G_2$                   | $42.32 \pm 1.92$     | 38   | 49   | 60           | 500   |
| $G_3$                   | $145.85 \pm 7.72$    | 129  | 209  | 297          | 500   |
| $G_4$                   | $406.03 \pm 21.47$   | 360  | 480  | 203          | 400   |
| $G_5$                   | $964.95 \pm 54.46$   | 870  | 1254 | 222          | 300   |
| $G_6$                   | $1991.86 \pm 104.12$ | 1801 | 2398 | 89           | 200   |
| $G_7$                   | $3638.62 \pm 135.09$ | 3292 | 4029 | 41           | 100   |

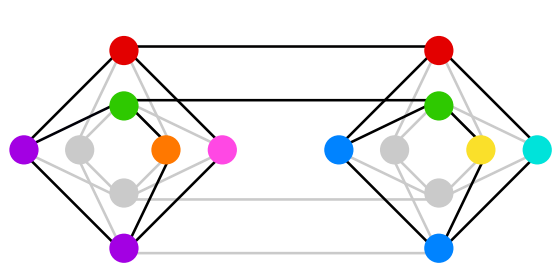

**Figure S1.** Possible embedding of the  $G_1$  graph onto the Chimera topology requiring 12 qubits.

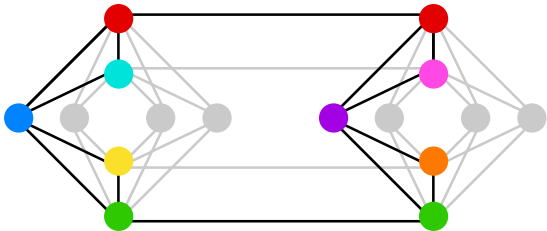

**Figure S2.** Possible 10-qubit embedding of the  $G_1$  graph onto a modified Chimera topology including a few of the triangular connections of the Pegasus topology.

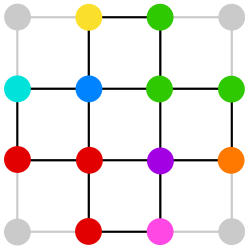

**Figure S3.** Possible embedding of the  $G_1$  graph onto a square lattice using 12 qubits.

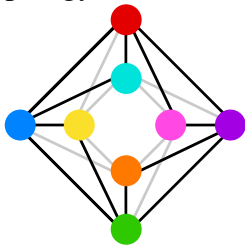

**Figure S4.** Possible embedding of the  $G_1$  graph onto the Pegasus topology.
